# Supplementary material for: Tribological properties of a series of carbon dots modified by ionic liquids with various anion species: experimental findings and density functional theory calculations
Source: Royal Society of Chemistry journal article supplement (doi:10.1039/d1dt00950h), 2021-01-01
Supplement: d1dt00950h1.pdf [file d1dt00950h1.pdf]

# **Tribological properties of a series of carbon dots modified by ionic liquids with various anion species: experimental findings and density functional theory calculations**

Baogang Wang<sup>a\*</sup>, Lilong Zhang<sup>a</sup>, Na Wang<sup>a</sup>, Wenmeng Duan<sup>a</sup> and Weiwei Tang<sup>b\*</sup>

<sup>a</sup> *College of Chemistry and Chemical Engineering, Southwest Petroleum University, Chengdu 610500, P. R. China*

<sup>b</sup> *College of Biological and Chemical Engineering, Panzhihua University, Panzhihua 617000, P. R. China*

---

\* Corresponding authors. E-mail: bgwang@swpu.edu.cn & wei\_wei\_tang@163.com; Fax:

+86-28-83037330; Tel: +86-28-83037330

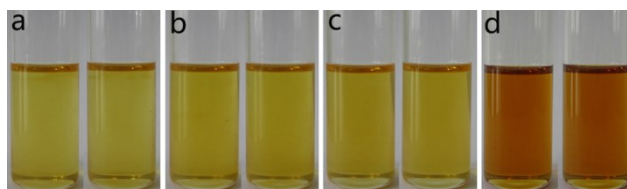

**Fig. S1** Optical photos of CDs-ILs-X/PEG200 suspensions containing (a) 0.20 wt% of CDs-ILs-NTf<sub>2</sub>, (b) 0.17 wt% of CDs-ILs-PF<sub>6</sub>, (c) 0.10 wt% of CDs-ILs-BScB and (d) 0.80 wt% of CDs-ILs-OL. The left and right photos in (a-d) are obtained from the suspensions after preparation and standing for 3 months, respectively.

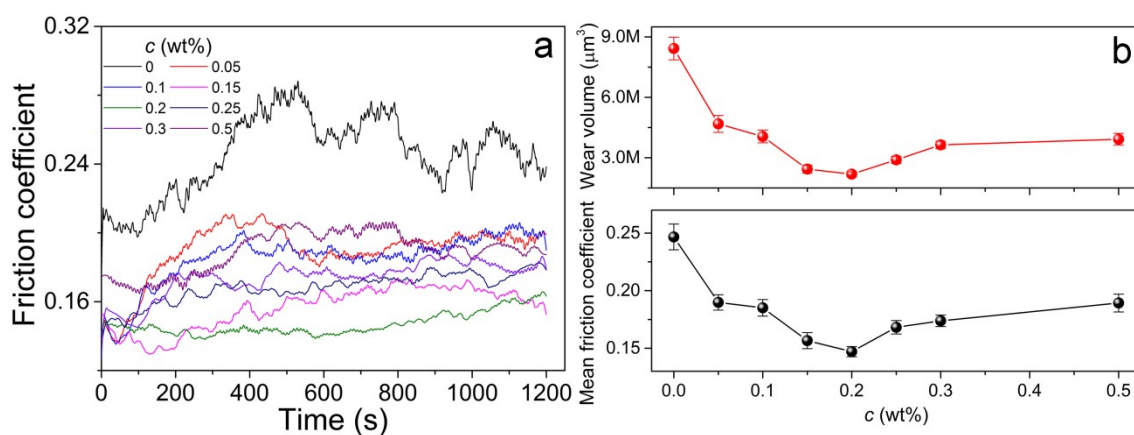

**Fig. S2** (a) Friction coefficient curves of the CDs-ILs-NTf<sub>2</sub>/PEG200 suspensions containing different  $c$  of CDs-ILs-NTf<sub>2</sub>. (b) The mean friction coefficient and wear volume of the lower plate lubricated by CDs-ILs-NTf<sub>2</sub>/PEG200 suspension varying with the increasing  $c$  of CDs-ILs-NTf<sub>2</sub>.

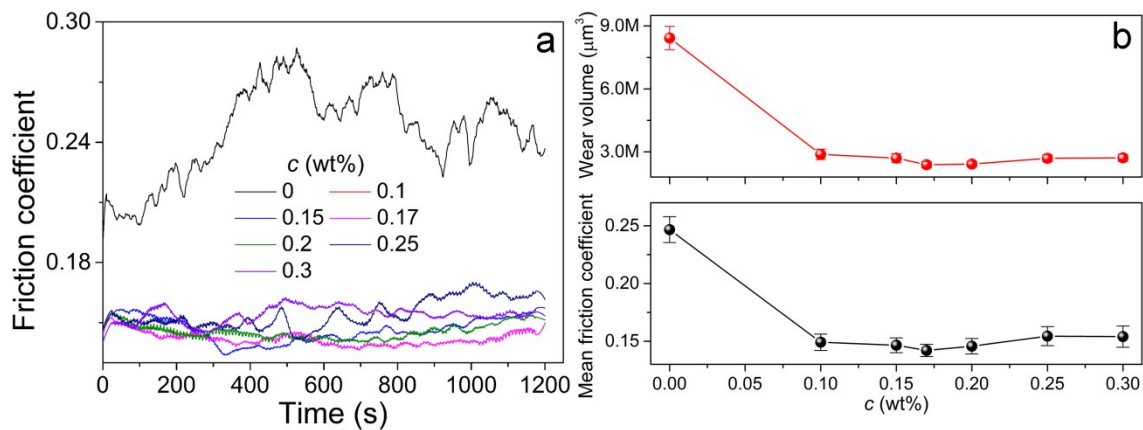

**Fig. S3** (a) Friction coefficient curves of the CDs-ILs-PF<sub>6</sub>/PEG200 suspensions containing different  $c$  of CDs-ILs-PF<sub>6</sub>. (b) The mean friction coefficient and wear volume of the lower plate lubricated by CDs-ILs-PF<sub>6</sub>/PEG200 suspension varying with the increasing  $c$  of CDs-ILs-PF<sub>6</sub>.

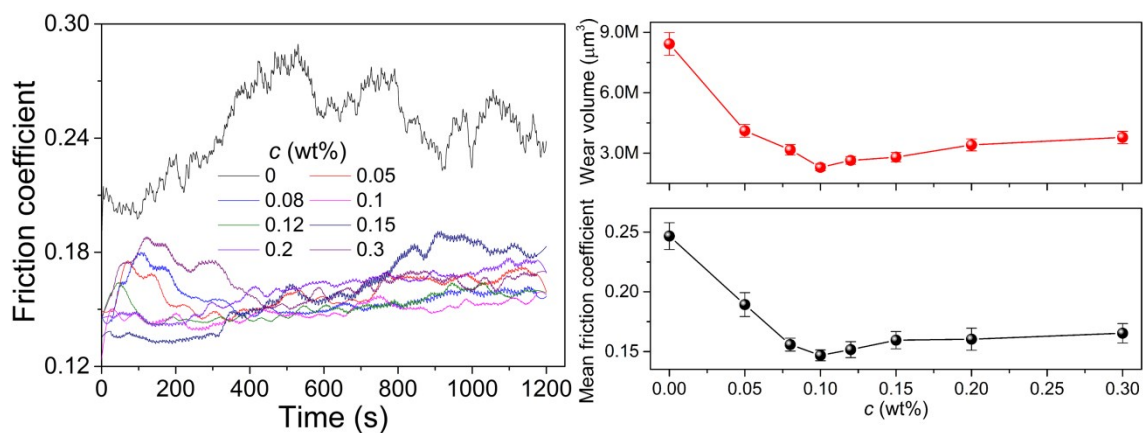

**Fig. S4** (a) Friction coefficient curves of the CDs-ILs-BScB/PEG200 suspensions containing different  $c$  of CDs-ILs-BScB. (b) The mean friction coefficient and wear volume of the lower plate lubricated by CDs-ILs-BScB suspension varying with the increasing  $c$  of CDs-ILs-BScB.

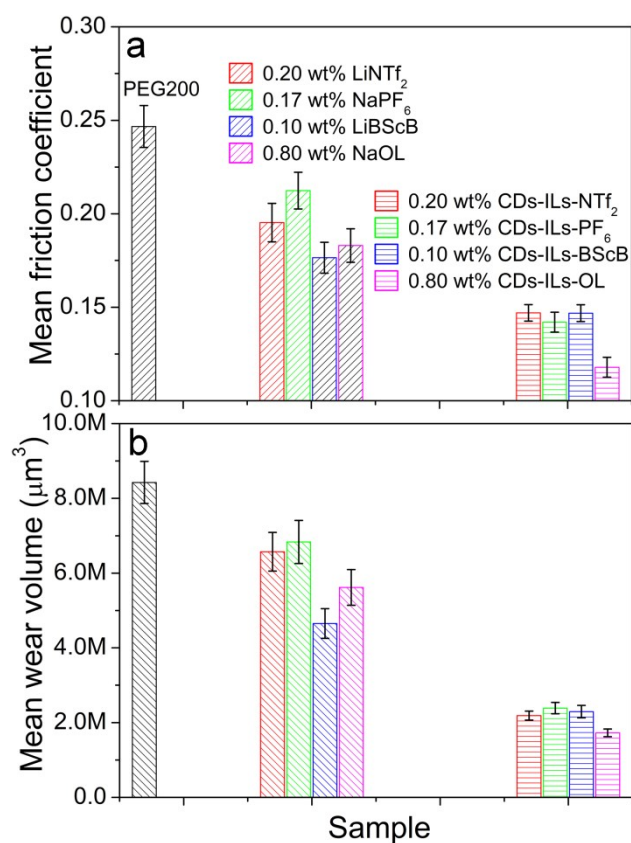

**Fig. S5** (a) The mean friction coefficients and (b) wear volumes of the lower plates lubricated by PEG200, PEG200 solutions containing various salts, and CDs-ILs-X/PEG200 suspensions.

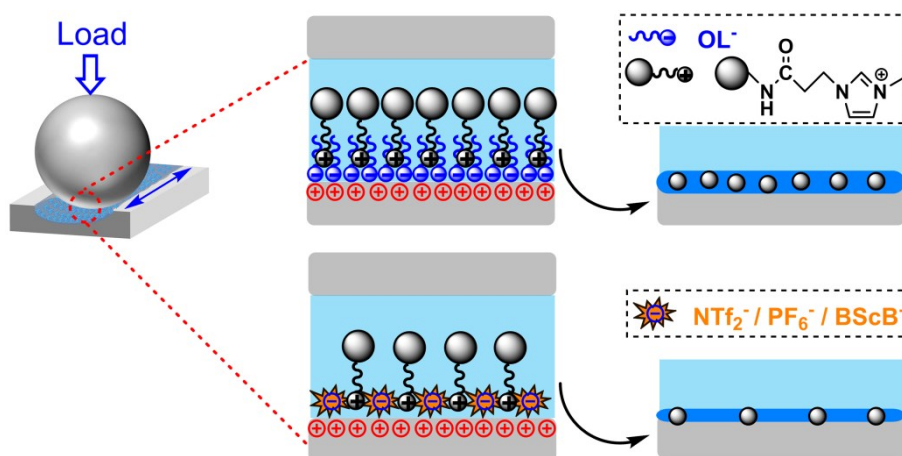

**Fig. S6** Schematic illustration of the lubricating mechanisms of CDs-ILs-X.
